# Supplementary material for: Positive Mental Health Questionnaire (PMHQ) for Healthcare Workers: A Psychometric Evaluation
Source: MDPI journal article supplement (doi:10.3390/healthcare11233041), 2023-11-26
Supplement: s1 [file s1]

## Supplementary Materials

**Table S1. A.** Polychoric correlation matrix of the 39 items.

|     | PCDi   | V1     | V2     | V3     | V4     | V5     | V6     | V7     | V8     | V9     | V10    | V11    | V12    | V13    | V14    | V15    | V16    | V17    | V18    | V19    | V20    | V21    | V22    | V23    | V24    | V25    | V26    | V27    | V28    | V29    | V30    | V31    | V32    | V33    | V34    | V35    | V36    | V37    | V38    | V39    |
|-----|--------|--------|--------|--------|--------|--------|--------|--------|--------|--------|--------|--------|--------|--------|--------|--------|--------|--------|--------|--------|--------|--------|--------|--------|--------|--------|--------|--------|--------|--------|--------|--------|--------|--------|--------|--------|--------|--------|--------|--------|
| V1  | 7.90%  | --     | 0.339  | 0.056  | -0.172 | -0.086 | 0.416  | -0.261 | -0.278 | -0.27  | -0.231 | 0.053  | 0.281  | 0.222  | 0.223  | 0.182  | 0.193  | 0.092  | 0.098  | 0.318  | 0.364  | -0.135 | 0.005  | -0.142 | 0.246  | 0.248  | 0.308  | 0.314  | 0.267  | 0.165  | 0.244  | -0.065 | -0.305 | -0.008 | -0.192 | -0.232 | -0.169 | -0.012 | -0.006 | 0.034  |
| V2  | 13.40% | 0.339  | --     | -0.053 | -0.185 | -0.179 | 0.206  | -0.204 | 0.028  | 0.038  | -0.062 | 0.038  | 0.215  | 0.23   | 0.198  | 0.081  | 0.265  | 0.069  | 0.051  | 0.511  | 0.376  | -0.239 | -0.018 | -0.205 | 0.431  | 0.254  | -0.055 | 0.093  | 0.068  | 0.178  | -0.012 | 0.035  | -0.128 | 0.027  | -0.058 | -0.045 | 0.041  | -0.09  | -0.102 | 0.006  |
| V3  | 52.30% | 0.075  | -0.071 | --     | 0.281  | 0.255  | 0.085  | 0.11   | 0.283  | 0.355  | 0.286  | 0.135  | -0.089 | 0.057  | -0.066 | -0.222 | -0.256 | 0.023  | -0.084 | -0.105 | 0.061  | 0.157  | 0.471  | 0.174  | -0.16  | -0.088 | 0.063  | -0.077 | -0.129 | -0.11  | -0.103 | 0.217  | 0.208  | 0.272  | 0.428  | 0.417  | 0.232  | 0.326  | 0.232  | 0.347  |
| V4  | 17.60% | -0.172 | -0.185 | 0.376  | --     | 0.409  | -0.103 | 0.171  | 0.257  | 0.192  | 0.396  | 0.079  | -0.098 | -0.216 | 0.036  | 0.028  | 0.033  | -0.052 | 0.047  | -0.268 | -0.24  | 0.271  | 0.361  | 0.158  | -0.257 | -0.065 | 0.121  | 0.017  | 0.127  | 0.09   | -0.076 | 0.177  | 0.312  | 0.266  | 0.431  | 0.325  | 0.233  | 0.442  | 0.091  | 0.232  |
| V5  | 51.40% | -0.115 | -0.24  | 0.455  | 0.547  | --     | -0.108 | 0.112  | 0.146  | 0.172  | 0.281  | 0.123  | -0.041 | -0.101 | -0.043 | 0.018  | -0.034 | -0.149 | 0.035  | -0.226 | -0.28  | 0.241  | 0.318  | 0.161  | -0.355 | -0.127 | 0.08   | -0.096 | 0.039  | -0.198 | -0.02  | 0.189  | 0.309  | 0.267  | 0.353  | 0.342  | 0.237  | 0.375  | 0.169  | 0.311  |
| V6  | 7.80%  | 0.416  | 0.206  | 0.114  | -0.103 | -0.144 | --     | -0.461 | -0.362 | -0.427 | -0.436 | -0.275 | 0.304  | 0.306  | 0.469  | 0.456  | 0.385  | 0.319  | 0.322  | 0.334  | 0.414  | -0.049 | -0.217 | -0.167 | 0.197  | 0.326  | 0.374  | 0.422  | 0.359  | 0.299  | 0.47   | -0.165 | -0.383 | 0.05   | -0.321 | -0.266 | -0.27  | -0.27  | -0.179 | -0.17  |
| V7  | 8.20%  | -0.261 | -0.204 | 0.146  | 0.171  | 0.149  | -0.461 | --     | 0.626  | 0.589  | 0.384  | 0.388  | -0.214 | -0.173 | -0.266 | -0.359 | -0.197 | -0.174 | -0.219 | -0.33  | -0.345 | 0.237  | 0.256  | 0.113  | -0.197 | -0.129 | -0.32  | -0.349 | -0.288 | -0.283 | -0.23  | 0.249  | 0.467  | 0.206  | 0.332  | 0.279  | 0.209  | 0.262  | 0.27   | 0.303  |
| V8  | 10.80% | -0.278 | 0.028  | 0.378  | 0.257  | 0.196  | -0.362 | 0.626  | --     | 0.744  | 0.594  | 0.373  | -0.318 | -0.261 | -0.347 | -0.337 | -0.251 | -0.163 | -0.204 | -0.206 | -0.251 | 0.196  | 0.361  | 0.358  | -0.083 | -0.068 | -0.328 | -0.317 | -0.4   | -0.149 | -0.344 | 0.369  | 0.624  | 0.358  | 0.517  | 0.45   | 0.441  | 0.489  | 0.288  | 0.377  |
| V9  | 10.60% | -0.27  | 0.038  | 0.475  | 0.192  | 0.23   | -0.427 | 0.589  | 0.744  | --     | 0.607  | 0.337  | -0.278 | -0.21  | -0.258 | -0.405 | -0.241 | -0.189 | -0.246 | -0.174 | -0.216 | 0.246  | 0.423  | 0.22   | -0.129 | -0.104 | -0.242 | -0.284 | -0.229 | -0.311 | -0.381 | 0.311  | 0.577  | 0.288  | 0.549  | 0.52   | 0.334  | 0.371  | 0.189  | 0.356  |
| V10 | 10.20% | -0.231 | -0.062 | 0.382  | 0.396  | 0.376  | -0.436 | 0.384  | 0.594  | 0.607  | --     | 0.234  | -0.214 | -0.109 | -0.289 | -0.376 | -0.295 | -0.227 | -0.224 | -0.226 | -0.258 | 0.161  | 0.473  | 0.299  | -0.032 | -0.189 | -0.283 | -0.345 | -0.293 | -0.267 | -0.434 | 0.358  | 0.586  | 0.304  | 0.649  | 0.549  | 0.437  | 0.529  | 0.292  | 0.416  |
| V11 | 9.00%  | 0.053  | 0.038  | 0.18   | 0.079  | 0.164  | -0.275 | 0.388  | 0.373  | 0.337  | 0.234  | --     | -0.149 | -0.227 | -0.54  | -0.476 | -0.278 | -0.251 | -0.445 | -0.038 | -0.333 | 0.108  | 0.337  | 0.25   | -0.004 | -0.213 | -0.331 | -0.309 | -0.27  | -0.329 | -0.353 | 0.297  | 0.289  | 0.207  | 0.151  | 0.212  | 0.201  | 0.243  | 0.291  | 0.182  |
| V12 | 48.10% | 0.376  | 0.287  | -0.16  | -0.13  | -0.074 | 0.406  | -0.286 | -0.425 | -0.371 | -0.286 | -0.199 | --     | 0.237  | 0.452  | 0.356  | 0.202  | 0.175  | 0.21   | 0.256  | 0.195  | -0.112 | -0.102 | -0.082 | 0.154  | 0.133  | 0.14   | 0.189  | 0.205  | 0.085  | 0.152  | -0.087 | -0.238 | -0.118 | -0.201 | -0.143 | -0.131 | -0.117 | -0.06  | -0.105 |

|     |        |        |        |        |        |        |        |        |        |        |        |        |        |        |        |        |        |        |        |        |        |        |        |        |        |        |        |        |        |        |        |        |        |        |        |        |        |        |        |        |        |
|-----|--------|--------|--------|--------|--------|--------|--------|--------|--------|--------|--------|--------|--------|--------|--------|--------|--------|--------|--------|--------|--------|--------|--------|--------|--------|--------|--------|--------|--------|--------|--------|--------|--------|--------|--------|--------|--------|--------|--------|--------|--------|
| V13 | 47.30% | 0.297  | 0.307  | 0.101  | -0.288 | -0.18  | 0.409  | -0.231 | -0.349 | -0.28  | -0.146 | -0.304 | 0.423  | --     | --     | 0.453  | 0.221  | 0.199  | 0.201  | 0.223  | 0.288  | 0.294  | -0.097 | -0.04  | -0.001 | 0.341  | 0.217  | 0.23   | 0.208  | 0.232  | 0.082  | 0.119  | 0.027  | -0.212 | -0.084 | -0.125 | -0.185 | -0.198 | -0.143 | -0.079 | 0.019  |
| V14 | 11.40% | 0.223  | 0.198  | -0.089 | 0.036  | -0.058 | 0.469  | -0.266 | -0.347 | -0.258 | -0.289 | -0.54  | 0.604  | 0.606  | --     | --     | 0.694  | 0.512  | 0.51   | 0.452  | 0.359  | 0.507  | -0.077 | -0.421 | -0.312 | 0.122  | 0.379  | 0.464  | 0.374  | 0.476  | 0.386  | 0.478  | -0.231 | -0.209 | -0.195 | -0.244 | -0.224 | -0.365 | -0.279 | -0.28  | -0.16  |
| V15 | 9.50%  | 0.182  | 0.081  | -0.296 | 0.028  | 0.024  | 0.456  | -0.359 | -0.337 | -0.405 | -0.376 | -0.476 | 0.476  | 0.296  | 0.694  | --     | --     | 0.543  | 0.506  | 0.589  | 0.125  | 0.326  | 0.035  | -0.514 | -0.143 | 0.107  | 0.442  | 0.523  | 0.454  | 0.502  | 0.4    | 0.619  | -0.265 | -0.229 | -0.163 | -0.353 | -0.334 | -0.219 | -0.382 | -0.376 | -0.305 |
| V16 | 47.40% | 0.258  | 0.354  | -0.457 | 0.044  | -0.061 | 0.514  | -0.263 | -0.336 | -0.322 | -0.394 | -0.371 | 0.361  | 0.355  | 0.685  | 0.726  | --     | --     | 0.494  | 0.434  | 0.061  | 0.141  | 0.077  | -0.392 | -0.216 | 0.003  | 0.475  | 0.28   | 0.209  | 0.272  | 0.254  | 0.375  | -0.174 | -0.226 | -0.178 | -0.329 | -0.337 | -0.204 | -0.197 | -0.357 | -0.214 |
| V17 | 11.30% | 0.092  | 0.069  | 0.031  | -0.052 | -0.2   | 0.319  | -0.174 | -0.163 | -0.189 | -0.227 | -0.251 | 0.234  | 0.269  | 0.51   | 0.506  | 0.66   | --     | --     | 0.658  | 0.04   | 0.215  | 0.032  | -0.282 | -0.185 | 0.096  | 0.292  | 0.233  | 0.202  | 0.222  | 0.273  | 0.248  | -0.029 | -0.217 | -0.179 | -0.176 | -0.094 | -0.114 | -0.24  | -0.248 | -0.143 |
| V18 | 8.80%  | 0.098  | 0.051  | -0.112 | 0.047  | 0.047  | 0.322  | -0.219 | -0.204 | -0.246 | -0.224 | -0.445 | 0.28   | 0.298  | 0.452  | 0.589  | 0.58   | 0.658  | --     | --     | 0.09   | 0.192  | 0.068  | -0.222 | -0.175 | 0.053  | 0.342  | 0.312  | 0.359  | 0.267  | 0.321  | 0.397  | -0.091 | -0.177 | -0.126 | -0.054 | -0.248 | -0.18  | -0.168 | -0.362 | -0.205 |
| V19 | 9.80%  | 0.318  | 0.511  | -0.141 | -0.268 | -0.303 | 0.334  | -0.33  | -0.206 | -0.174 | -0.226 | -0.038 | 0.342  | 0.384  | 0.359  | 0.125  | 0.082  | 0.04   | 0.09   | --     | --     | 0.502  | -0.14  | -0.154 | -0.245 | 0.421  | 0.249  | 0.129  | 0.17   | 0.154  | 0.224  | 0.146  | -0.04  | -0.245 | -0.093 | -0.119 | -0.145 | -0.037 | -0.218 | -0.016 | -0.208 |
| V20 | 6.50%  | 0.364  | 0.376  | 0.081  | -0.24  | -0.374 | 0.414  | -0.345 | -0.251 | -0.216 | -0.258 | -0.333 | 0.26   | 0.393  | 0.507  | 0.326  | 0.189  | 0.215  | 0.192  | 0.502  | --     | --     | -0.168 | -0.12  | -0.462 | 0.415  | 0.44   | 0.322  | 0.202  | 0.26   | 0.228  | 0.348  | 0.05   | -0.298 | -0.117 | -0.047 | -0.214 | -0.18  | -0.149 | -0.061 | 0.016  |
| V21 | 51.70% | -0.18  | -0.32  | 0.28   | 0.362  | 0.431  | -0.065 | 0.317  | 0.262  | 0.329  | 0.215  | 0.145  | -0.199 | -0.173 | -0.103 | 0.047  | 0.137  | 0.043  | 0.091  | -0.187 | -0.224 | --     | --     | 0.23   | 0.16   | -0.249 | 0      | 0.027  | -0.014 | 0.002  | -0.109 | 0.003  | 0.171  | 0.227  | 0.217  | 0.261  | 0.253  | 0.18   | 0.248  | 0.084  | 0.162  |
| V22 | 14.40% | 0.005  | -0.018 | 0.63   | 0.361  | 0.425  | -0.217 | 0.256  | 0.361  | 0.423  | 0.473  | 0.337  | -0.137 | -0.053 | -0.421 | -0.514 | -0.524 | -0.282 | -0.222 | -0.154 | -0.12  | 0.307  | --     | --     | 0.36   | -0.06  | -0.193 | -0.239 | -0.291 | -0.311 | -0.252 | -0.3   | 0.342  | 0.4    | 0.361  | 0.549  | 0.489  | 0.467  | 0.588  | 0.28   | 0.376  |
| V23 | 9.50%  | -0.142 | -0.205 | 0.232  | 0.158  | 0.215  | -0.167 | 0.113  | 0.358  | 0.22   | 0.299  | 0.25   | -0.11  | -0.001 | -0.312 | -0.143 | -0.289 | -0.185 | -0.175 | -0.245 | -0.462 | 0.213  | 0.36   | --     | --     | -0.058 | -0.24  | -0.102 | -0.061 | -0.248 | 0.017  | -0.225 | 0.15   | 0.39   | 0.227  | 0.179  | 0.257  | 0.276  | 0.292  | 0.133  | 0.217  |
| V24 | 16.30% | 0.246  | 0.431  | -0.213 | -0.257 | -0.474 | 0.197  | -0.197 | -0.083 | -0.129 | -0.032 | -0.004 | 0.206  | 0.456  | 0.122  | 0.107  | 0.004  | 0.096  | 0.053  | 0.421  | 0.415  | -0.333 | -0.06  | -0.058 | --     | --     | 0.306  | 0.051  | 0.084  | 0.073  | 0.27   | -0.006 | 0.015  | -0.111 | -0.069 | -0.155 | -0.154 | -0.055 | -0.184 | 0.006  | -0.032 |
| V25 | 11.40% | 0.248  | 0.254  | -0.117 | -0.065 | -0.17  | 0.326  | -0.129 | -0.068 | -0.104 | -0.189 | -0.213 | 0.178  | 0.29   | 0.379  | 0.442  | 0.635  | 0.292  | 0.342  | 0.249  | 0.44   | 0      | -0.193 | -0.24  | 0.306  | --     | --     | 0.245  | 0.227  | 0.328  | 0.309  | 0.368  | -0.167 | -0.089 | 0.042  | -0.087 | -0.309 | -0.095 | -0.058 | -0.182 | -0.186 |
| V26 | 5.40%  | 0.308  | -0.055 | 0.084  | 0.121  | 0.107  | 0.374  | -0.32  | -0.328 | -0.242 | -0.283 | -0.331 | 0.188  | 0.308  | 0.464  | 0.523  | 0.375  | 0.233  | 0.312  | 0.129  | 0.322  | 0.036  | -0.239 | -0.102 | 0.051  | 0.245  | --     | --     | 0.558  | 0.722  | 0.286  | 0.435  | -0.154 | -0.205 | 0.06   | -0.175 | -0.21  | -0.229 | -0.11  | -0.327 | -0.206 |
| V27 | 4.70%  | 0.314  | 0.093  | -0.103 | 0.017  | -0.128 | 0.422  | -0.349 | -0.317 | -0.284 | -0.345 | -0.309 | 0.252  | 0.278  | 0.374  | 0.454  | 0.279  | 0.202  | 0.359  | 0.17   | 0.202  | -0.019 | -0.291 | -0.061 | 0.084  | 0.227  | 0.558  | --     | --     | 0.532  | 0.374  | 0.458  | -0.179 | -0.22  | 0.036  | -0.208 | -0.22  | -0.203 | -0.174 | -0.39  | -0.132 |

|     |        |        |        |        |        |        |        |        |        |        |        |        |        |        |        |        |        |        |        |        |        |        |        |        |        |        |        |        |        |        |        |       |        |        |       |        |        |        |        |        |        |
|-----|--------|--------|--------|--------|--------|--------|--------|--------|--------|--------|--------|--------|--------|--------|--------|--------|--------|--------|--------|--------|--------|--------|--------|--------|--------|--------|--------|--------|--------|--------|--------|-------|--------|--------|-------|--------|--------|--------|--------|--------|--------|
| V28 | 6.00%  | 0.267  | 0.068  | -0.172 | 0.127  | 0.052  | 0.359  | -0.288 | -0.4   | -0.229 | -0.293 | -0.27  | 0.274  | 0.31   | 0.476  | 0.502  | 0.363  | 0.222  | 0.267  | 0.154  | 0.26   | 0.002  | -0.311 | -0.248 | 0.073  | 0.328  | 0.722  | 0.532  | --     | --     | 0.241  | 0.367 | -0.161 | -0.234 | 0.058 | -0.255 | -0.337 | -0.397 | -0.249 | -0.293 | -0.25  |
| V29 | 8.60%  | 0.165  | 0.178  | -0.148 | 0.09   | -0.265 | 0.299  | -0.283 | -0.149 | -0.311 | -0.267 | -0.329 | 0.113  | 0.11   | 0.386  | 0.4    | 0.339  | 0.273  | 0.321  | 0.224  | 0.228  | -0.145 | -0.252 | 0.017  | 0.27   | 0.309  | 0.286  | 0.374  | 0.241  | --     | --     | 0.419 | -0.259 | -0.209 | -0.08 | -0.285 | -0.333 | -0.2   | -0.21  | -0.246 | -0.289 |
| V30 | 6.10%  | 0.244  | -0.012 | -0.138 | -0.076 | -0.027 | 0.47   | -0.23  | -0.344 | -0.381 | -0.434 | -0.353 | 0.204  | 0.16   | 0.478  | 0.619  | 0.501  | 0.248  | 0.397  | 0.146  | 0.348  | 0.004  | -0.3   | -0.225 | -0.006 | 0.368  | 0.435  | 0.458  | 0.367  | 0.419  | --     | --    | -0.239 | -0.249 | 0.031 | -0.34  | -0.265 | -0.265 | -0.275 | -0.286 | -0.231 |
| V31 | 49.80% | -0.087 | 0.047  | 0.387  | 0.236  | 0.337  | -0.221 | 0.332  | 0.494  | 0.415  | 0.478  | 0.396  | -0.156 | 0.048  | -0.309 | -0.354 | -0.311 | -0.038 | -0.121 | -0.054 | 0.066  | 0.305  | 0.458  | 0.201  | 0.02   | -0.223 | -0.206 | -0.24  | -0.215 | -0.347 | -0.32  | --    | --     | 0.3    | 0.212 | 0.295  | 0.284  | 0.228  | 0.241  | 0.144  | 0.245  |
| V32 | 12.40% | -0.305 | -0.128 | 0.278  | 0.312  | 0.413  | -0.383 | 0.467  | 0.624  | 0.577  | 0.586  | 0.289  | -0.318 | -0.283 | -0.209 | -0.229 | -0.302 | -0.217 | -0.177 | -0.245 | -0.298 | 0.303  | 0.4    | 0.39   | -0.111 | -0.089 | -0.205 | -0.22  | -0.234 | -0.209 | -0.249 | 0.4   | --     | --     | 0.49  | 0.489  | 0.521  | 0.457  | 0.52   | 0.175  | 0.358  |
| V33 | 50.90% | -0.011 | 0.036  | 0.485  | 0.356  | 0.476  | 0.066  | 0.275  | 0.479  | 0.385  | 0.406  | 0.277  | -0.21  | -0.15  | -0.261 | -0.217 | -0.319 | -0.239 | -0.168 | -0.125 | -0.157 | 0.387  | 0.482  | 0.304  | -0.093 | 0.056  | 0.08   | 0.048  | 0.078  | -0.106 | 0.042  | 0.379 | 0.654  | --     | --    | 0.382  | 0.335  | 0.359  | 0.409  | 0.104  | 0.241  |
| V34 | 14.30% | -0.192 | -0.058 | 0.571  | 0.431  | 0.471  | -0.321 | 0.332  | 0.517  | 0.549  | 0.649  | 0.151  | -0.268 | -0.167 | -0.244 | -0.353 | -0.44  | -0.176 | -0.054 | -0.119 | -0.047 | 0.349  | 0.549  | 0.179  | -0.155 | -0.087 | -0.175 | -0.208 | -0.255 | -0.285 | -0.34  | 0.394 | 0.489  | 0.511  | --    | --     | 0.649  | 0.503  | 0.557  | 0.288  | 0.476  |
| V35 | 13.70% | -0.232 | -0.045 | 0.558  | 0.325  | 0.457  | -0.266 | 0.279  | 0.45   | 0.52   | 0.549  | 0.212  | -0.191 | -0.247 | -0.224 | -0.334 | -0.451 | -0.094 | -0.248 | -0.145 | -0.214 | 0.337  | 0.489  | 0.257  | -0.154 | -0.309 | -0.21  | -0.22  | -0.337 | -0.333 | -0.265 | 0.379 | 0.521  | 0.448  | 0.649 | --     | --     | 0.515  | 0.438  | 0.294  | 0.4    |
| V36 | 11.30% | -0.169 | 0.041  | 0.31   | 0.233  | 0.316  | -0.27  | 0.209  | 0.441  | 0.334  | 0.437  | 0.201  | -0.175 | -0.265 | -0.365 | -0.219 | -0.272 | -0.114 | -0.18  | -0.037 | -0.18  | 0.24   | 0.467  | 0.276  | -0.055 | -0.095 | -0.229 | -0.203 | -0.397 | -0.2   | -0.265 | 0.304 | 0.457  | 0.48   | 0.503 | 0.515  | --     | --     | 0.526  | 0.164  | 0.318  |
| V37 | 13.50% | -0.012 | -0.09  | 0.435  | 0.442  | 0.502  | -0.27  | 0.262  | 0.489  | 0.371  | 0.529  | 0.243  | -0.156 | -0.191 | -0.279 | -0.382 | -0.263 | -0.24  | -0.168 | -0.218 | -0.149 | 0.331  | 0.588  | 0.292  | -0.184 | -0.058 | -0.11  | -0.174 | -0.249 | -0.21  | -0.275 | 0.322 | 0.52   | 0.547  | 0.557 | 0.438  | 0.526  | --     | --     | 0.22   | 0.439  |
| V38 | 11.70% | -0.006 | -0.102 | 0.31   | 0.091  | 0.226  | -0.179 | 0.27   | 0.288  | 0.189  | 0.292  | 0.291  | -0.08  | -0.106 | -0.28  | -0.376 | -0.477 | -0.248 | -0.362 | -0.016 | -0.061 | 0.112  | 0.28   | 0.133  | 0.006  | -0.182 | -0.327 | -0.39  | -0.293 | -0.246 | -0.286 | 0.193 | 0.175  | 0.139  | 0.288 | 0.294  | 0.164  | 0.22   | --     | --     | 0.301  |
| V39 | 50.10% | 0.045  | 0.008  | 0.62   | 0.31   | 0.555  | -0.228 | 0.405  | 0.504  | 0.476  | 0.556  | 0.243  | -0.187 | 0.033  | -0.214 | -0.408 | -0.382 | -0.192 | -0.274 | -0.278 | 0.022  | 0.29   | 0.503  | 0.29   | -0.043 | -0.248 | -0.276 | -0.177 | -0.334 | -0.387 | -0.309 | 0.437 | 0.479  | 0.43   | 0.636 | 0.534  | 0.424  | 0.586  | 0.402  | --     | --     |

Percentage of covariance destroyed in each variable.

**Table S1. B.** Factorial loads per factor for each model.

| Item | 1 factor model |      | 4 factor model |      |      |      | 6 factors model |      |      |      |      |
|------|----------------|------|----------------|------|------|------|-----------------|------|------|------|------|
|      | F1             | F1   | F2             | F3   | F4   | F1   | F2              | F3   | F4   | F5   | F6   |
| R4   | 0.47           | 0.59 |                |      |      | 0.60 |                 |      |      |      |      |
| R6   | 0.45           | 0.56 |                |      |      | 0.56 |                 |      |      |      |      |
| R7   | 0.44           | 0.55 |                |      |      | 0.55 |                 |      |      |      |      |
| R12  | 0.66           | 0.81 |                |      |      | 0.82 |                 |      |      |      |      |
| R14  | 0.68           | 0.84 |                |      |      | 0.84 |                 |      |      |      |      |
| R31  | 0.65           | 0.81 |                |      |      | 0.81 |                 |      |      |      |      |
| R38  | 0.42           | 0.56 |                |      |      | 0.56 |                 |      |      |      |      |
| R39  | 0.47           | 0.62 |                |      |      | 0.63 |                 |      |      |      |      |
| R1   | 0.36           |      | 0.43           |      |      |      | 0.17            |      |      |      |      |
| R3   | 0.23           |      | 0.33           |      |      |      | 0.35            |      |      |      |      |
| R23  | 0.55           |      | 0.67           |      |      |      | 0.76            |      |      |      |      |
| R25  | 0.38           |      | 0.50           |      |      |      | 0.59            |      |      |      |      |
| R37  | 0.50           |      | 0.64           |      |      |      | 0.75            |      |      |      |      |
| R8   | 0.38           |      | 0.49           |      |      |      |                 | 0.53 |      |      |      |
| R9   | 0.47           |      | 0.59           |      |      |      |                 | 0.66 |      |      |      |
| R11  | 0.34           |      | 0.45           |      |      |      |                 | 0.83 |      |      |      |
| R18  | 0.64           |      | 0.78           |      |      |      |                 | 0.80 |      |      |      |
| R20  | 0.39           |      | 0.48           |      |      |      |                 | 0.79 |      |      |      |
| R24  | 0.29           |      | 0.40           |      |      |      |                 |      | 0.73 |      |      |
| R30  | 0.39           |      | 0.46           |      |      |      |                 |      | 0.66 |      |      |
| R10  | 0.54           |      |                | 0.73 |      |      |                 |      | 0.76 |      |      |
| R13  | 0.48           |      |                | 0.66 |      |      |                 |      | 0.55 |      |      |
| R19  | 0.56           |      |                | 0.75 |      |      |                 |      | 0.72 |      |      |
| R33  | 0.43           |      |                | 0.55 |      |      |                 |      |      | 0.12 |      |
| R34  | 0.54           |      |                | 0.72 |      |      |                 |      |      | 0.77 |      |
| R15  | 0.51           |      |                |      | 0.53 |      |                 |      |      | 0.63 |      |
| R16  | 0.68           |      |                |      | 0.72 |      |                 |      |      | 0.79 |      |
| R17  | 0.56           |      |                |      | 0.60 |      |                 |      |      | 0.74 |      |
| R27  | 0.70           |      |                |      | 0.74 |      |                 |      |      | 0.61 |      |
| R28  | 0.66           |      |                |      | 0.70 |      |                 |      |      | 0.71 |      |
| R29  | 0.54           |      |                |      | 0.57 |      |                 |      |      | 0.42 |      |
| R32  | 0.62           |      |                |      | 0.66 |      |                 |      |      | 0.75 |      |
| R35  | 0.39           |      |                |      | 0.40 |      |                 |      |      |      | 0.40 |
| R36  | 0.66           |      |                |      | 0.70 |      |                 |      |      |      | 0.61 |
| R2   | 0.55           |      |                |      | 0.57 |      |                 |      |      |      | 0.46 |
| R5   | 0.59           |      |                |      | 0.62 |      |                 |      |      |      | 0.81 |
| R21  | 0.76           |      |                |      | 0.79 |      |                 |      |      |      | 0.50 |
| R22  | 0.73           |      |                |      | 0.76 |      |                 |      |      |      | 0.41 |
| R26  | 0.71           |      |                |      | 0.74 |      |                 |      |      |      | 0.49 |

F: Factor

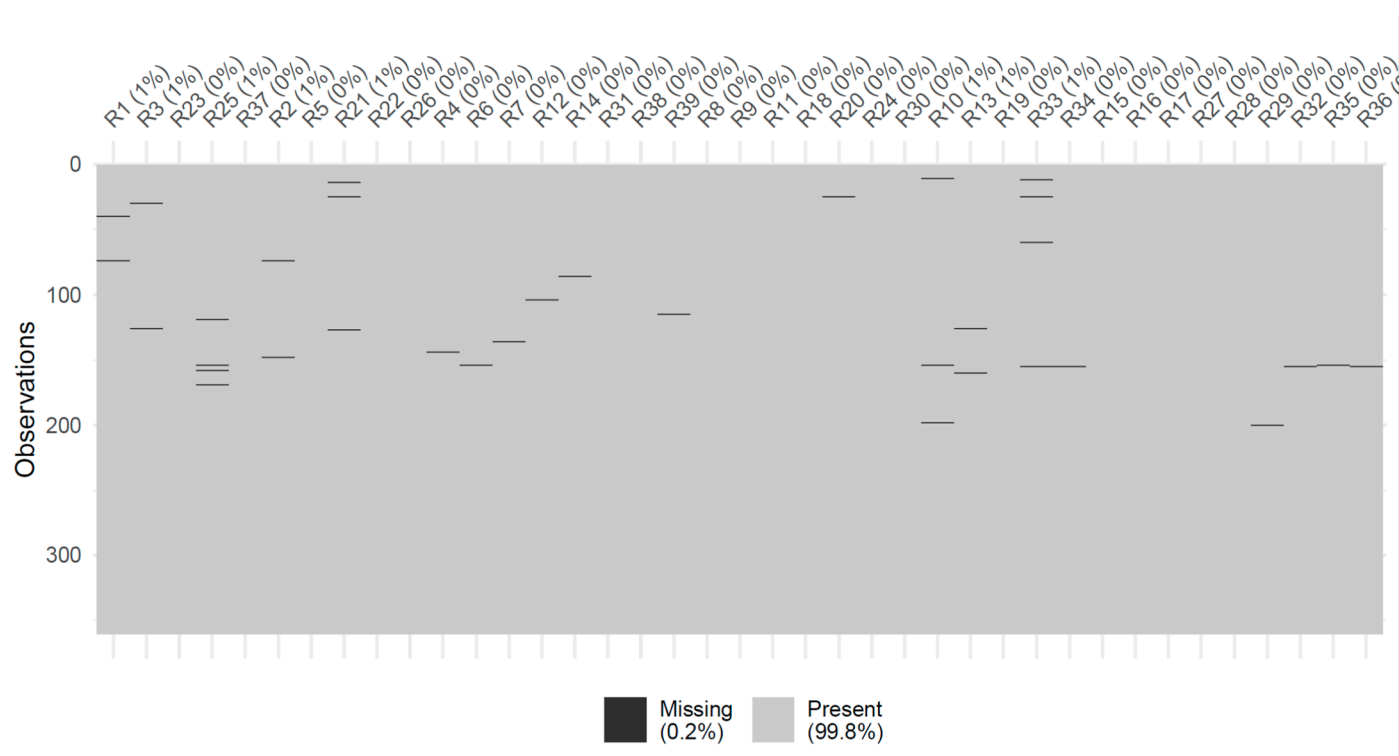

**Figure S1.** A. Missing data pattern for Positive Mental Health Questionnaire (PMHQ).
